# Supplementary material for: The inotropic agent digitoxin strengthens desmosomal adhesion in cardiac myocytes in an ERK1/2-dependent manner
Source: PubMed Central journal article supplement (PMC7299919; doi:10.1007/s00395-020-0805-3), 2020-06-17

## **SUPPLEMENTARY DATA- Basic Research in Cardiology**

### **Uncropped Western blots**

**The inotropic agent digitoxin strengthens desmosomal adhesion in cardiac myocytes in an ERK1/2-dependent manner**

Camilla Schinner<sup>1,2+</sup>, Silvana Olivares-Florez<sup>1+</sup>, Angela Schlipp<sup>1</sup>, Sebastian Trenz<sup>1</sup>, Manouk Feinendegen<sup>1</sup>, Heinrich Flaswinkel<sup>3</sup>, Ellen Kempf<sup>1</sup>, Desalegn Tadesse Egu<sup>1</sup>, Sunil Yeruva<sup>1</sup>, and Jens Waschke<sup>1\*</sup>

<sup>1</sup>Faculty of Medicine, Ludwig-Maximilians-Universität (LMU) Munich, Munich, Germany

<sup>2</sup>Department of Biomedicine, University of Basel, Basel, Switzerland

<sup>3</sup>Department of Biology II, Ludwig-Maximilians-Universität (LMU) Munich, Munich, Germany

+Authors contributed equally.

#### **\*Corresponding author:**

Jens Waschke, Faculty of Medicine, Ludwig-Maximilians-Universität (LMU) Munich, Pettenkofferstraße 11, 80336 Munich, Germany; Phone: +49-89-2180-72610; Fax: +49-89-2180-72602; jens.waschke@med.uni-muenchen.de

**Uncropped Western blots with marker images corresponding to bands shown in the indicated figures**

Band signal image shown on the left, overlay of bands with corresponding marker image shown on the right. To enable more protein incubations some blots were cut at 70 kDa and incubated separately. Bands appearing from previous antibody incubations are indicated in brackets and smaller font size. Blots are shown in order of antibody incubation. Antibody species: “m” = mouse; “rb” = rabbit. Prestained protein ladder PageRuler plus (10 – 250 kDa, Thermo Scientific) was used as size marker for all blots.

Supplementary Data – uncropped Western blots

Figure 5A

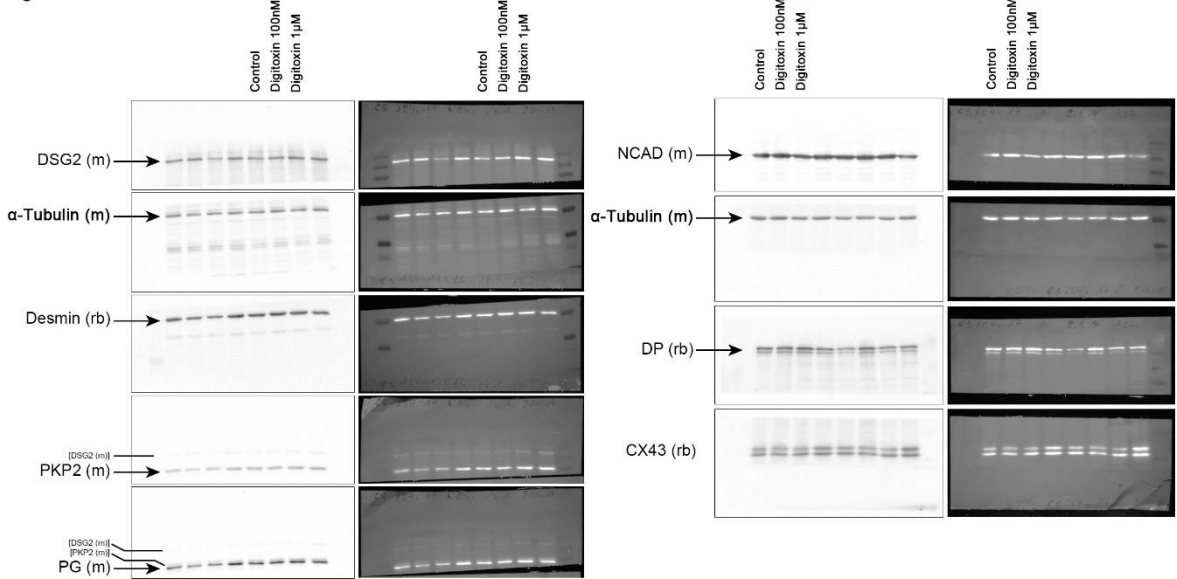

Figure 5B

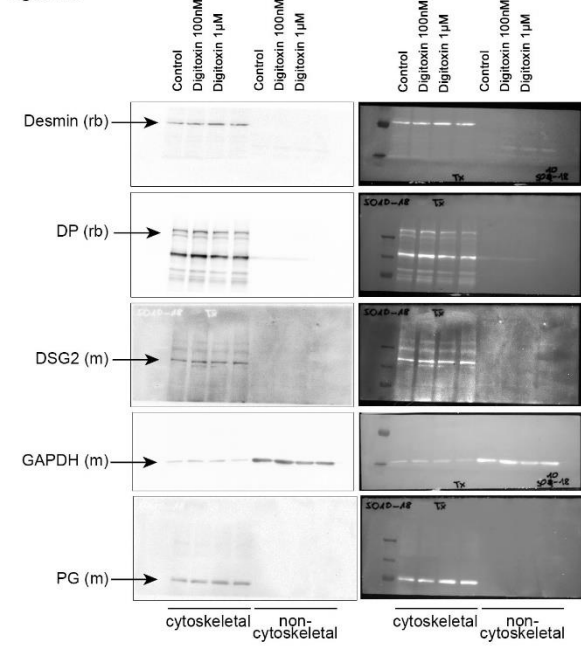

Supplementary Data – uncropped Western blots

Figure 6A

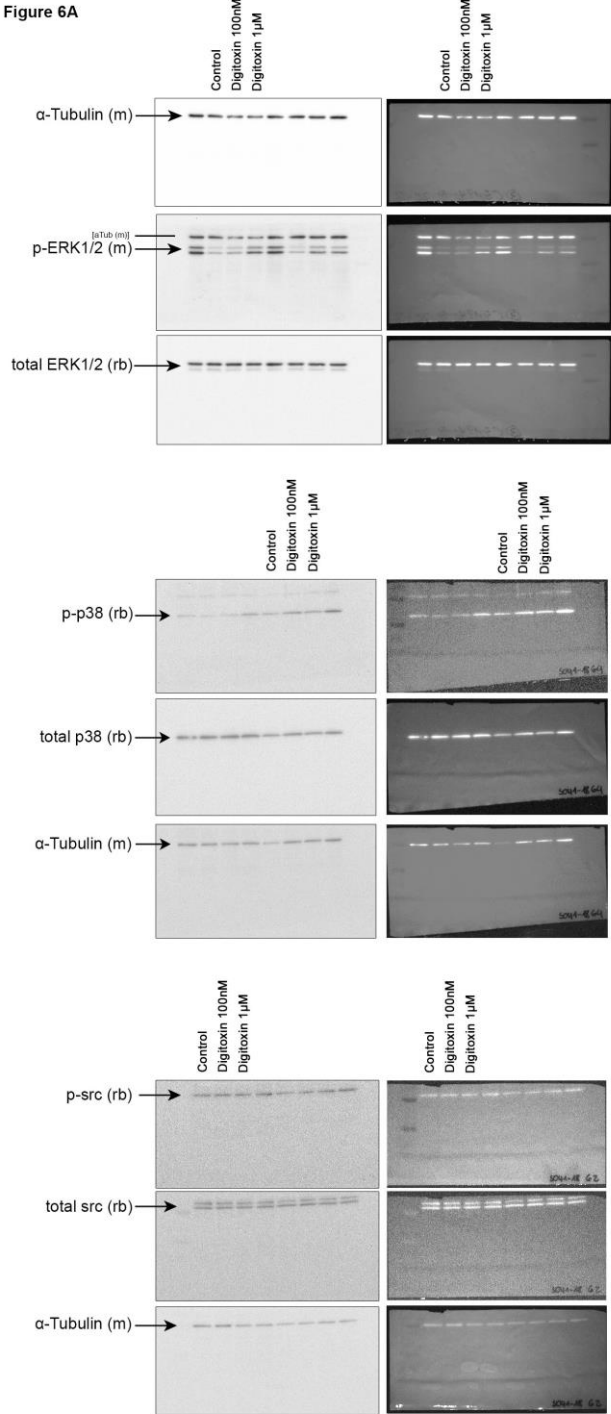

Supplementary Data – uncropped Western blots

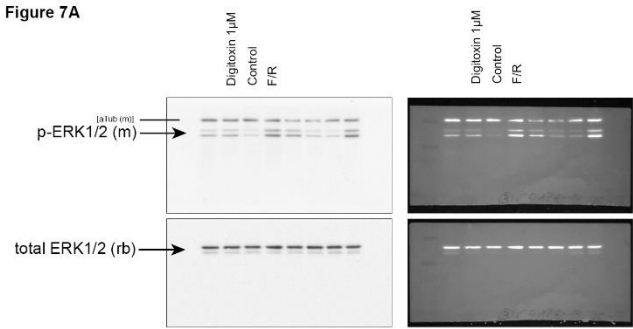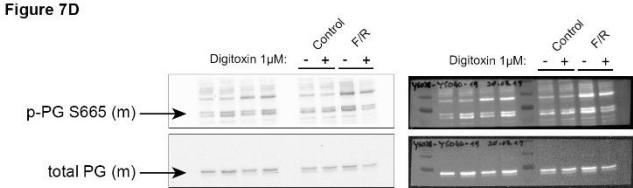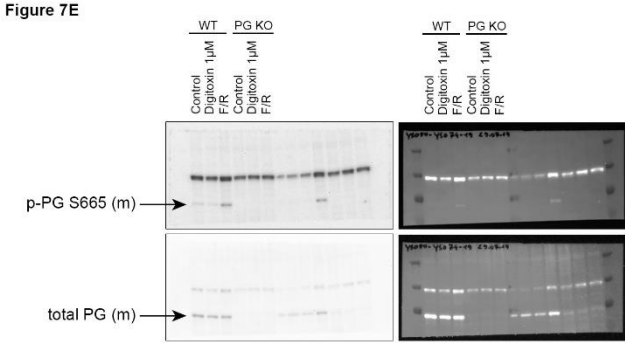

Supplementary Data – uncropped Western blots

Supplementary Figure 2

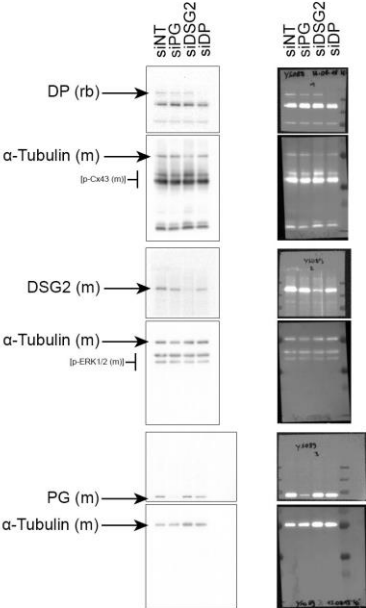

Supplementary Data – uncropped Western blots

Supplementary Figure 3A

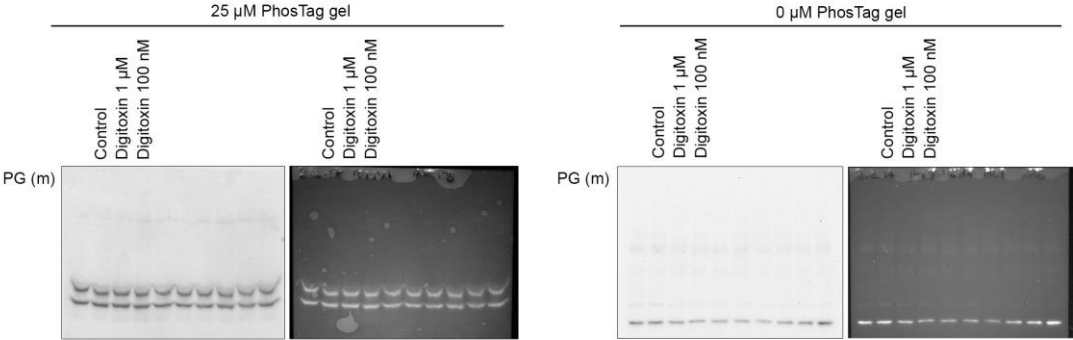

Supplementary Figure 3B

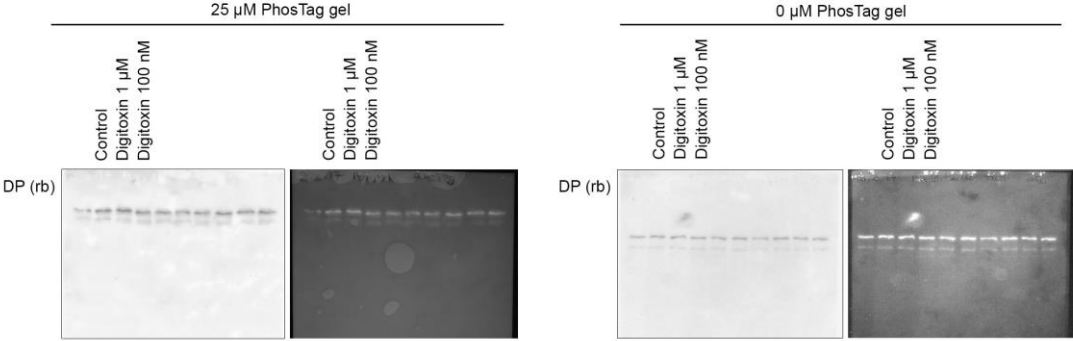

Supplementary Data – uncropped Western blots

Supplementary Figure 4

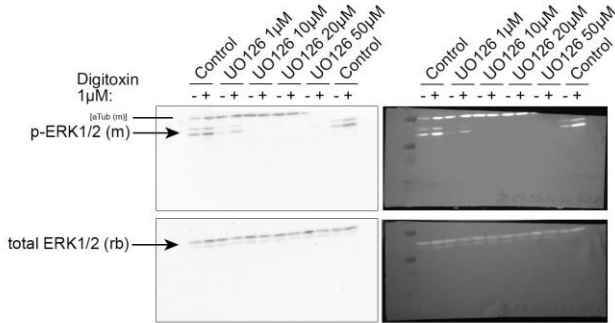



Supplementary Data – uncropped Western blots

Supplementary Figure 5A

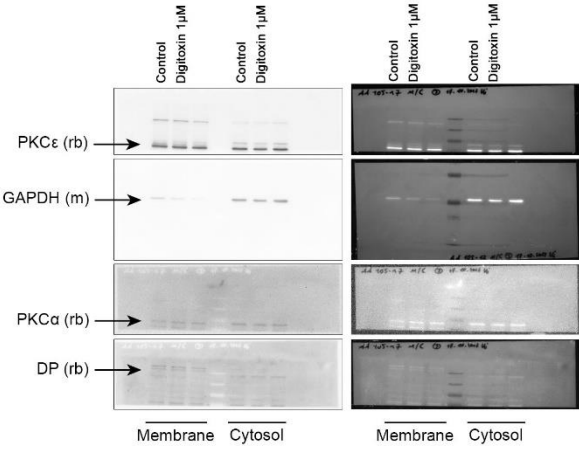

Supplement: 395_2020_805_MOESM1_ESM.pdf [file 395_2020_805_MOESM1_ESM.pdf]
