# Supplementary material for: The inotropic agent digitoxin strengthens desmosomal adhesion in cardiac myocytes in an ERK1/2-dependent manner
Source: PubMed Central journal article supplement (PMC7299919; doi:10.1007/s00395-020-0805-3), 2020-06-17
Supplement: 395_2020_805_MOESM2_ESM.pdf [file 395_2020_805_MOESM2_ESM.pdf]

1 **SUPPLEMENTARY DATA- Basic Research in Cardiology**

2 **The inotropic agent digitoxin strengthens desmosomal adhesion in cardiac myocytes**  
3 **in an ERK1/2-dependent manner**

4

5 Camilla Schinner<sup>1,2+</sup>, Silvana Olivares-Florez<sup>1+</sup>, Angela Schlipp<sup>1</sup>, Sebastian Trenz<sup>1</sup>, Manouk  
6 Feinendegen<sup>1</sup>, Heinrich Flaswinkel<sup>3</sup>, Ellen Kempf<sup>1</sup>, Desalegn Tadesse Egu<sup>1</sup>, Sunil Yeruva<sup>1</sup>,  
7 and Jens Waschke<sup>1\*</sup>

8

9 <sup>1</sup>Faculty of Medicine, Ludwig-Maximilians-Universität (LMU) Munich, Munich, Germany

10 <sup>2</sup>Department of Biomedicine, University of Basel, Basel, Switzerland

11 <sup>3</sup>Department of Biology II, Ludwig-Maximilians-Universität (LMU) Munich, Munich, Germany

12 <sup>+</sup>Authors contributed equally.

13

14 **\*Corresponding author:**

15 Jens Waschke, Faculty of Medicine, Ludwig-Maximilians-Universität (LMU)

16 Munich, Pettenkofferstraße 11, 80336 Munich, Germany; Phone:

17 +49-89-2180-72610; Fax: +49-89-2180-72602; jens.waschke@med.uni-muenchen.de

18

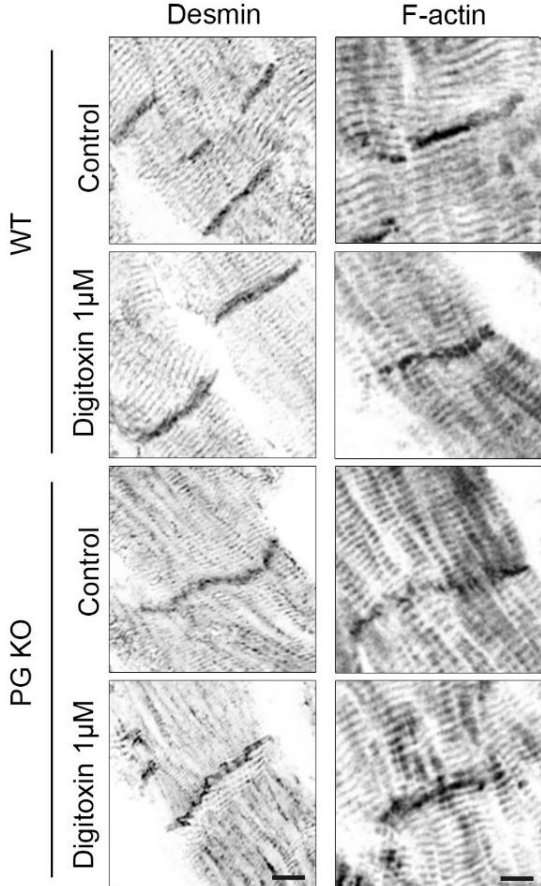

19 **Supplementary Figure 1. Digitoxin does not alter morphology of myofilaments.**  
20 Representative immunostaining images of ICDs of murine cardiac slices treated with digitoxin  
21 1 μM for 60 min and stained for desmin or f-actin, scale bar 5 μm. For better visibility, single  
22 channel images were inverted. N = 3 mice per condition.

23

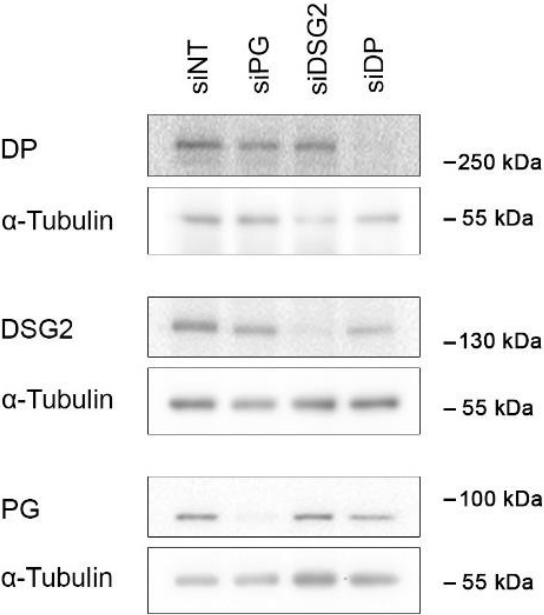

24 **Supplementary Figure 2. Reduced levels of PG, DSG2 and DP by siRNA.**

25 Representative Western blots corresponding to experiments in Figure 5c to confirm reduced  
26 protein levels of indicated proteins.  $\alpha$ -Tubulin served as loading control.

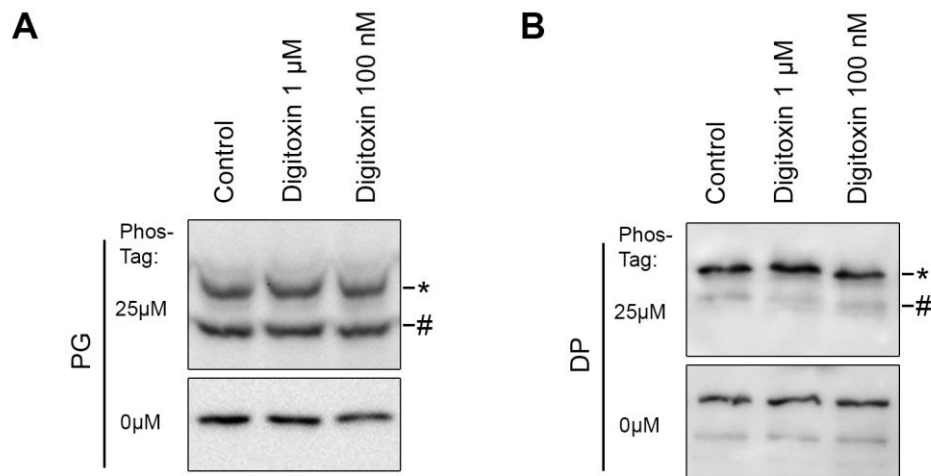

27 **Supplementary Figure 3. Digitoxin has no effect on the phosphorylation state of PG or**  
28 **DP.** Separation of phosphorylated proteins by Phos-Tag in HL-1 cells treated with digitoxin at  
29 concentrations of 100 nM or 1 μM for 60 min. Phosphorylation of PG (**A**) or DP (**B**) is visible  
30 in the 25 μM Phos-Tag as higher migrating bands (\*) vs. the lower non- or lower-  
31 phosphorylated migrating bands (#). Gels without addition of Phos-Tag reagent served as  
32 control to exclude protein fragmentation. N = 6 independent experiments.

Supplementary Data

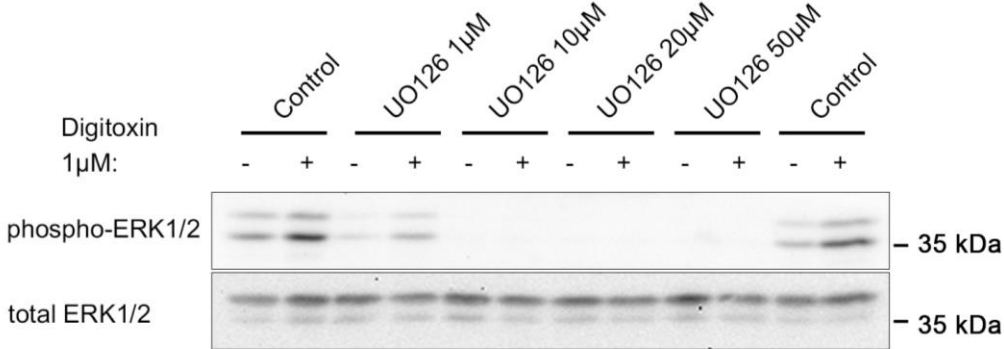

33 **Supplementary Figure 4. UO 126 inhibits ERK1/2 phosphorylation in a concentration-**  
34 **dependent manner.** Representative Western blot analysis to reveal phosphorylation state of  
35 ERK1/2 in HL-1 cardiac myocytes pre-treated with the MEK1/2 inhibitor UO 126 at indicated  
36 concentrations for 60 min with subsequent application of digitoxin 1 µM for 60 min. N = 6  
37 independent experiments.

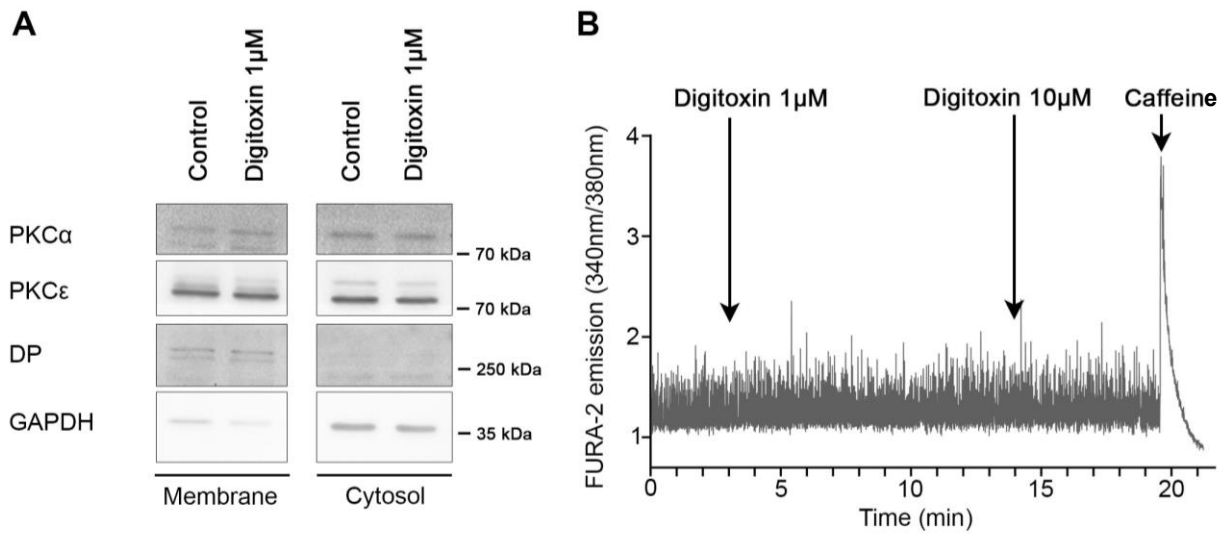

38 **Supplementary Figure 5. Digitoxin did not alter Ca<sup>2+</sup> levels or PKC activation.** (A)  
 39 Representative membrane isolation to reveal activation state of PKCα and PKCε in HL-1  
 40 cardiac myocytes treated with digitoxin 1 μM for 60 min. GAPDH served for the cytosolic and  
 41 DP for the membrane fraction as loading and separation control. N = 3 independent  
 42 experiments. (B) Representative FURA-2 measurements (ratio 340nm/380nm) to determine  
 43 Ca<sup>2+</sup> levels in HL-1 cardiac myocytes treated with digitoxin 1 μM and 10 μM as indicated.  
 44 Caffeine 10 μM served as positive control. N = 7 independent experiments.

45 **Supplementary Methods**

46 **Immunostaining**

47 To visualize protein distribution, confluent HL-1 cells were treated as indicated and fixed in 2  
48 % paraformaldehyde (PFA) in PBS for 10 min, permeabilized with 0.1 % Triton-X-100 in PBS  
49 for 5 min, and blocked with 3 % bovine serum albumin / 10 % normal goat serum (Sigma-  
50 Aldrich) in PBS for 60 min. Immunostaining of murine cardiac slices was performed as  
51 previously described <sup>1</sup>. Briefly, after incubation with corresponding reagents, cardiac tissue  
52 was snap frozen in liquid nitrogen and cut with a cryostat (Cryostar NX70, Thermo Fisher  
53 Scientific) in 7 µm thin sections. Probes were then heated to 37°C for 8 min, washed in PBS  
54 and fixed in 2 % PFA for 10 min. Then slices were permeabilized with 1 % Triton-X-100 for 60  
55 min, washed in PBS and blocked with 3 % bovine serum albumin/10 % normal goat serum in  
56 PBS for 60 minutes. The following primary antibodies were incubated at 4 °C over night:  
57 polyclonal rabbit anti-DSG2 (Progen Biotechnik, Heidelberg, Germany, #610121), monoclonal  
58 mouse anti-PG (Progen, #61005), monoclonal mouse anti-DP1/2 (Progen, #61003), polyclonal  
59 rabbit anti-desmin (Abcam, #ab32362) and monoclonal mouse anti-NCAD (BD Transduction,  
60 #610921). Cy2-, and Cy3- conjugated goat anti-rabbit or goat anti-mouse secondary antibodies  
61 (Dianova, Hamburg, Germany) were incubated for 60 min at room temperature. F-actin was  
62 stained with phalloidin-Alexa Fluor 488 (Thermo Fisher Scientific, #A12379) for 60 min at room  
63 temperature. 1.5 % n-propylgallate/ 60 % glycerol (Sigma-Aldrich) in PBS was used as  
64 mounting medium. Samples were imaged and analyzed with the Leica SP5 confocal  
65 microscope equipped with a 63x oil objective using LAS-AF software (all Leica microsystems).  
66 A maximum intensity projection of 10 consecutive images with 0.3 µm step height is shown for  
67 HL-1 cells.

68 **Western blot analysis**

69 HL-1 cells were treated as indicated and washed in cold PBS and lysed in ice-cold SDS-lysis  
70 buffer (25 mM 4-(2-hydroxyethyl)piperazine-1-ethanesulfonic acid (HEPES), 2 mM

## Supplementary Data

71 ethylenediaminetetraacetic acid (EDTA), 25 mM sodium fluoride (NaF), 1 %  
72 sodiumdodecylsulfate (SDS), pH 7.4) supplemented with a protease-inhibitor cocktail  
73 (Complete-O, Roche) and PhosSTOP (Roche). Protein concentration was determined by BCA  
74 protein assay kit (Pierce, Thermo Scientific, Waltham, Germany) according to manufacturer's  
75 protocol. 10 or 20 µg protein were denatured in Laemmli buffer at 95 °C for 5 min and loaded  
76 on a 10 % SDS-polyacrylamide gel. After electrophoresis, proteins were transferred to a  
77 nitrocellulose membrane (Novex, Thermo Fisher Scientific) and blocked in 5 % non-fat milk in  
78 tris buffered saline, with TBS-Tween 20 buffer. The primary antibodies were diluted in 5 % non-  
79 fat milk or bovine serum albumin in TBS-T buffer and incubated at 4°C over night. The following  
80 primary antibodies were used: polyclonal rabbit anti-ERK1/2 (Cell signaling, Danvers, USA,  
81 #9102), polyclonal rabbit anti-phospho-ERK1/2 (Cell signaling, #4370), polyclonal rabbit anti-  
82 p38MAPKAP (Cell signaling, #9212), polyclonal rabbit anti-phospho-p38MAPK (Cell signaling,  
83 #9211), polyclonal rabbit anti-phospho-src (Cell signaling, #2101), polyclonal rabbit anti-src  
84 (Cell signaling, #2123), monoclonal mouse anti-DSG1/2 (Progen, #61002), monoclonal mouse  
85 anti-PG (Progen, #61005), monoclonal rabbit anti-desmin (Abcam, #ab32362), polyclonal  
86 rabbit anti-DP1/2 (Santa Cruz Biotechnology Inc., Santa Cruz, USA, #sc-33555), polyclonal  
87 rabbit anti-CX43 (Sigma-Aldrich, #SAB4501175), monoclonal mouse anti-NCAD (BD  
88 Transduction, #610921), monoclonal mouse anti-PKP2 (Progen, #651167), monoclonal  
89 mouse anti-GAPDH (Aviva Systems Biology, San Diego, USA, #OAEA00006), monoclonal  
90 mouse anti- $\alpha$ -tubulin (Abcam, Cambridge, UK, #ab7291), monoclonal mouse anti-phospho-PG  
91 S665 (clone 1B8). Horseradish peroxidase-conjugated goat anti-rabbit and anti-mouse  
92 secondary antibodies (Dianova) were incubated at room temperature for 120 min. Proteins  
93 were visualized by the ECL-method. Densitometric band analysis was performed with Image  
94 Studio Lite Ver. 5.2 (LI-COR Biosciences, Bad Homburg, Germany).



95 **Supplementary References**

- 96 1. Schinner C, Vielmuth F, Rotzer V, Hiermaier M, Radeva MY, Co TK, Hartlieb E,  
97 Schmidt A, Imhof A, Messoudi A, Horn A, Schlipp A, Spindler V, Waschke J. Adrenergic  
98 Signaling Strengthens Cardiac Myocyte Cohesion. *Circ Res* 2017;**120**:1305-1317.

99
